# Supplementary material for: Electrocatalytic oxidation and electrochemical detection of guanine,l-arginine andl-lysine at a copper nanoparticles-modified electrode
Source: Royal Society of Chemistry journal article supplement (doi:10.1039/c4ay01507j), 2014-07-02
Supplement: c4ay01507j1.pdf [file c4ay01507j1.pdf]

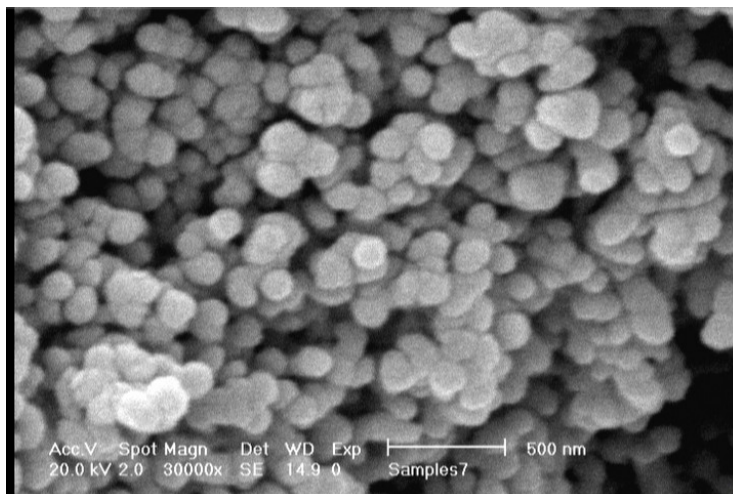

(A)

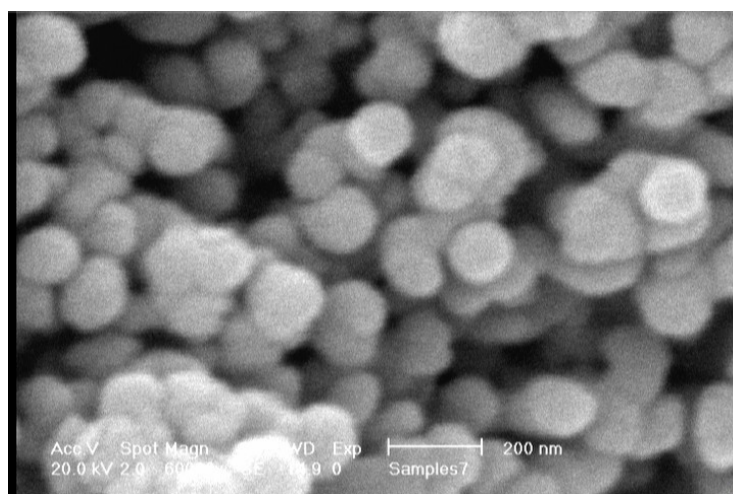

(B)

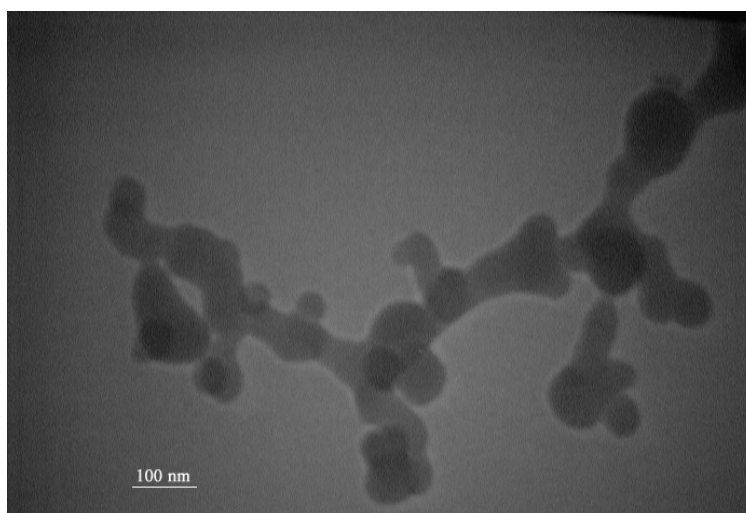

(C)

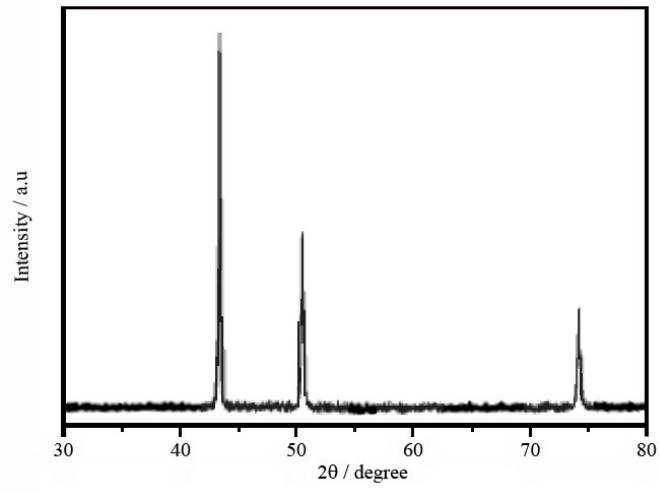

(D)

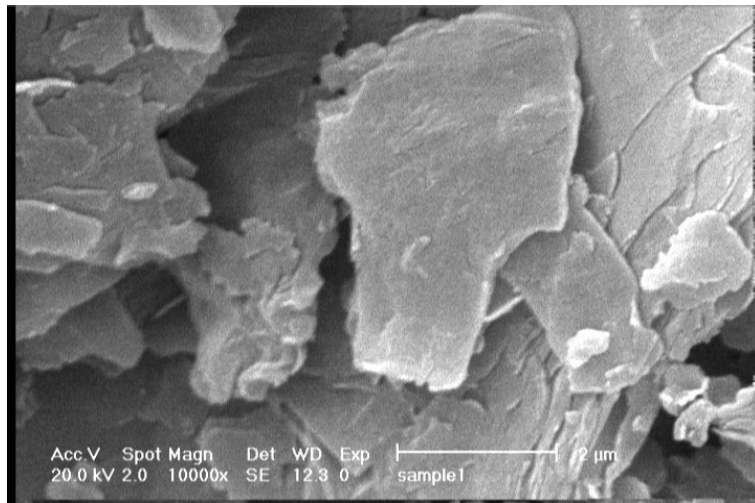

(E)

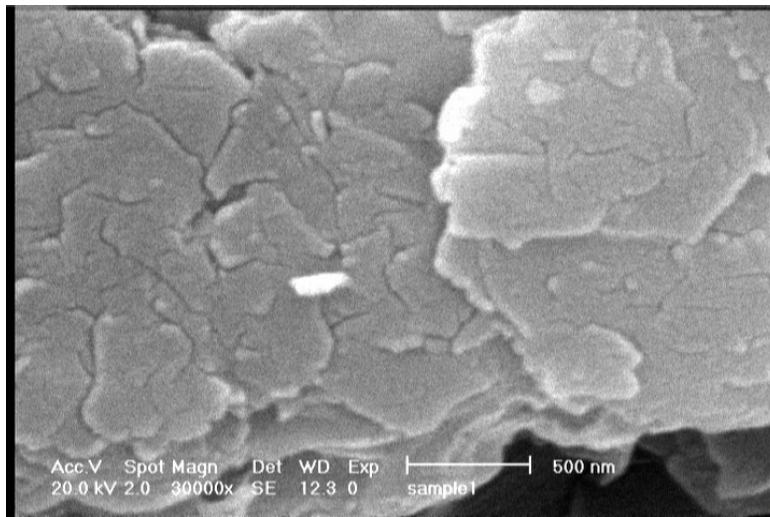

(F)

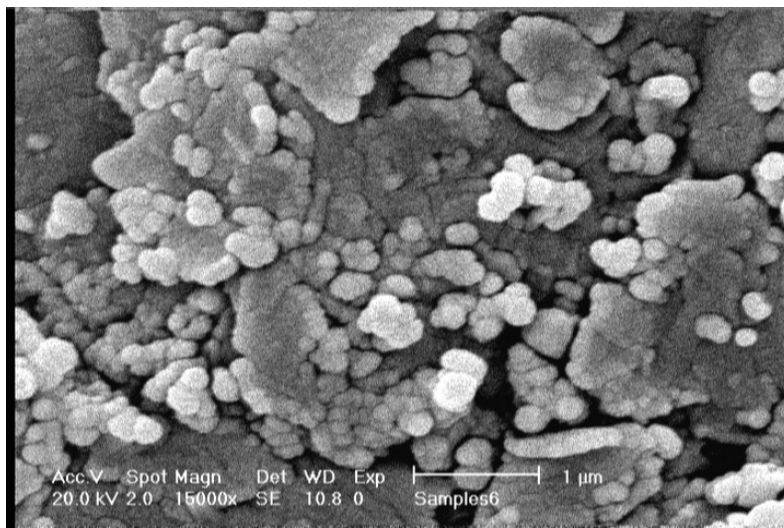

(G)

Figure S1: SEM and TEM images and XRD pattern of copper nanoparticles (A-D) and SEM images of graphite powder (E, F) and a paste comprised carbon microparticles and copper nanoparticles (G).

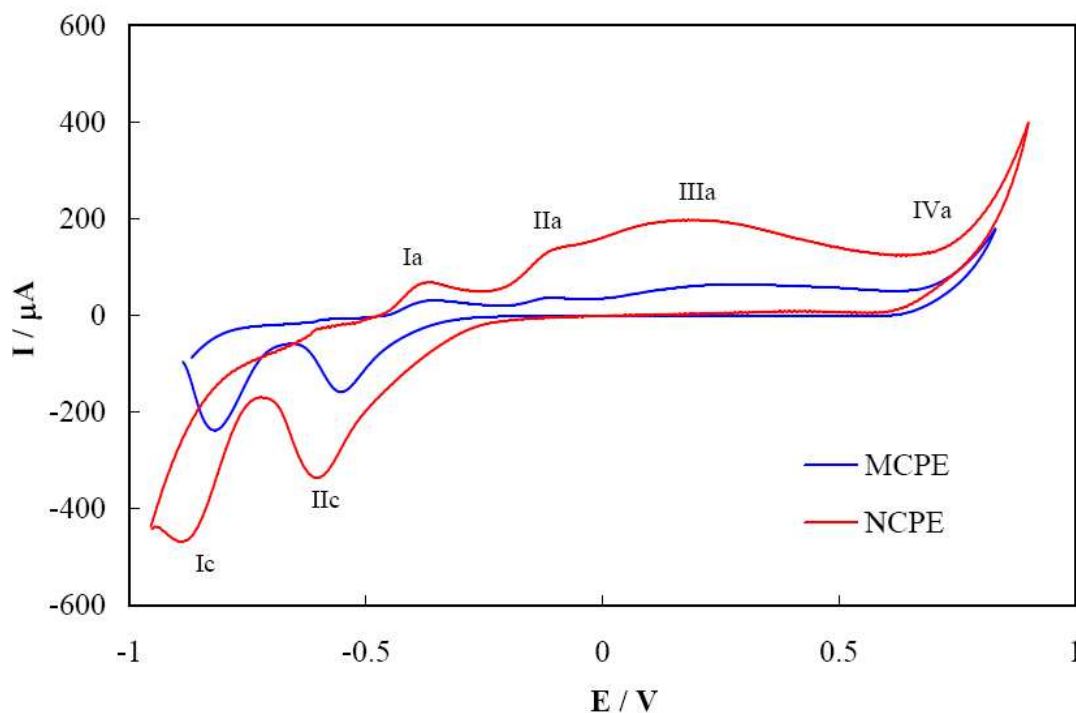

Figure S2: Typical cyclic voltammograms of MCPE and NCPE recorded in 100 mM NaOH solution. The potential sweep rate was 50 mV s<sup>-1</sup>.

The voltammograms were similar and containing different peaks (I to IV). In the voltammograms, different copper species convert together [s1-s4]: peak I<sub>a</sub> is related to the oxidation of Cu to Cu(I) species, peak II<sub>a</sub> is related to oxidation of both Cu and Cu(I) species to the Cu(II) moiety [s4] and, peaks I<sub>c</sub> and II<sub>c</sub> are related to the reduction of Cu(I) to Cu and Cu(II) to Cu(I) species, respectively [s2, s5]. In addition, the anodic charge in advance of the anodic decomposition of the electrolyte is related to the Cu(II)/Cu(III) transition [s4, s6]. The redox reactions in the voltammogram can be represented as:

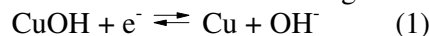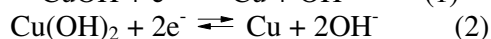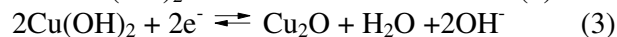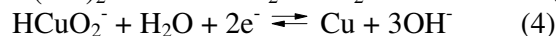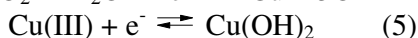

Regarding the nature of Cu(III) entity, copper oxyhydroxide and its radical (CuOO•H) have been proposed [s7, s8].

#### References:

- [s1] H. Heli, M. Hajjizadeh, A. Jabbari, A.A. Moosavi-Movahedi, *Anal. Biochem.* 388 (2009) 81.
- [s2] J.M. Marioli, T. Kuwana, *Electrochim. Acta* 37 (1992) 1187.
- [s3] L.D. Burke, M.J.G. Ahern, T.G. Ryan, *J. Electrochem. Soc.* 137 (1990) 553.
- [s4] S.M. Abd El Haleem, B.G. Ateya, *J. Electroanal. Chem.* 117 (1981) 309.
- [s5] L.D. Burke, M.J.G. Ahern, T.G. Ryan, *J. Electrochem. Soc.* 137 (1990) 553.
- [s6] A.M. Shams El Din, F.M. Abd El Wahab, *Electrochim. Acta* 9 (1964) 113.
- [s7] D. Meyerstein, F.M. Hawkrige, T. Kuwana, *J. Electroanal. Chem.* 40 (1972) 377.
- [s8] M. Fleischmann, K. Korinek, D. Pletcher, *J. Chem. Soc. Perkin Trans. 2* (1972) 1396.

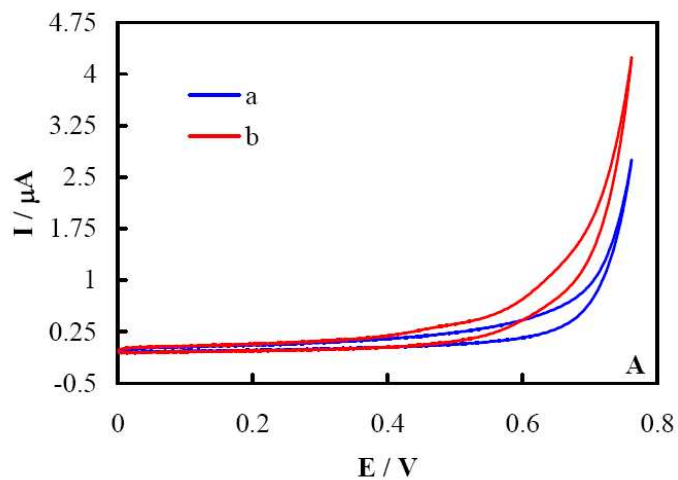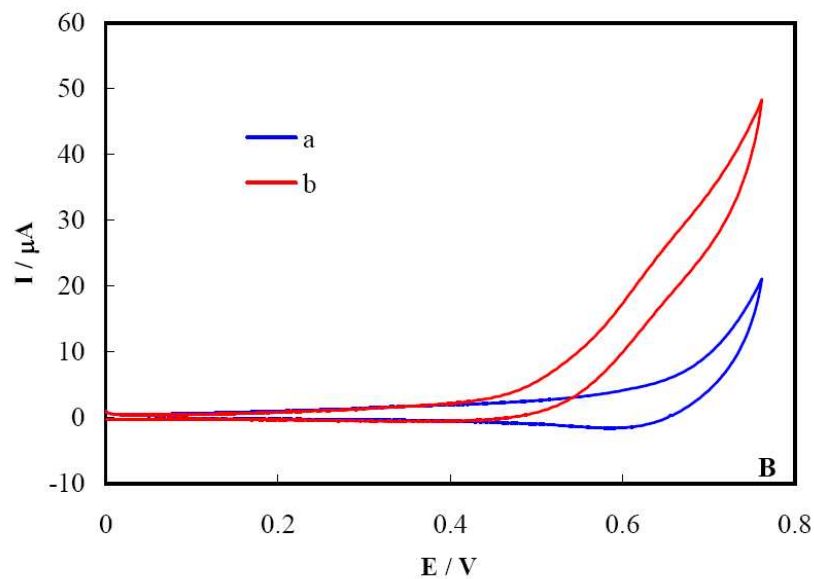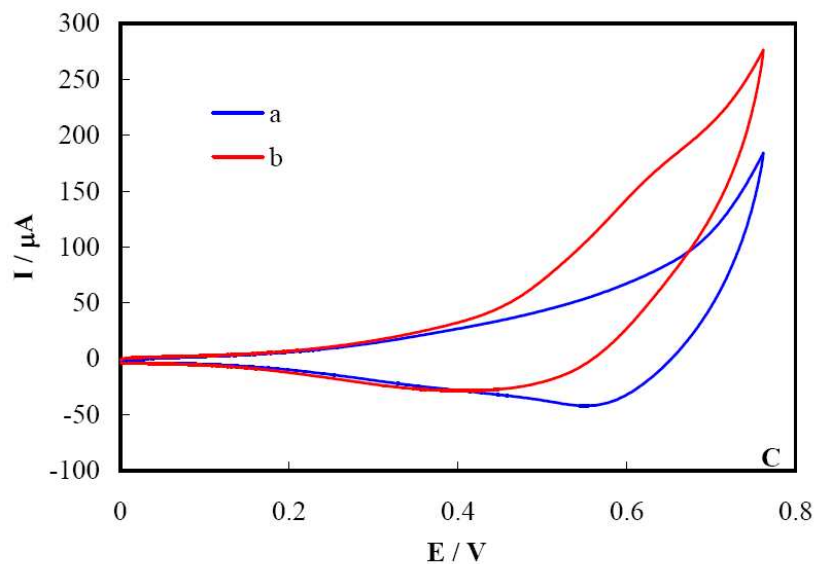

56  
57  
58  
59  
60

Figure S3-1: Cyclic voltammograms of UCPE (A), MCPE (B) and NCPE (C) in the absence (curve a) and presence (curve b) of 2.48 mM L-arginine. The potential sweep rate was  $50 \text{ mV s}^{-1}$ .



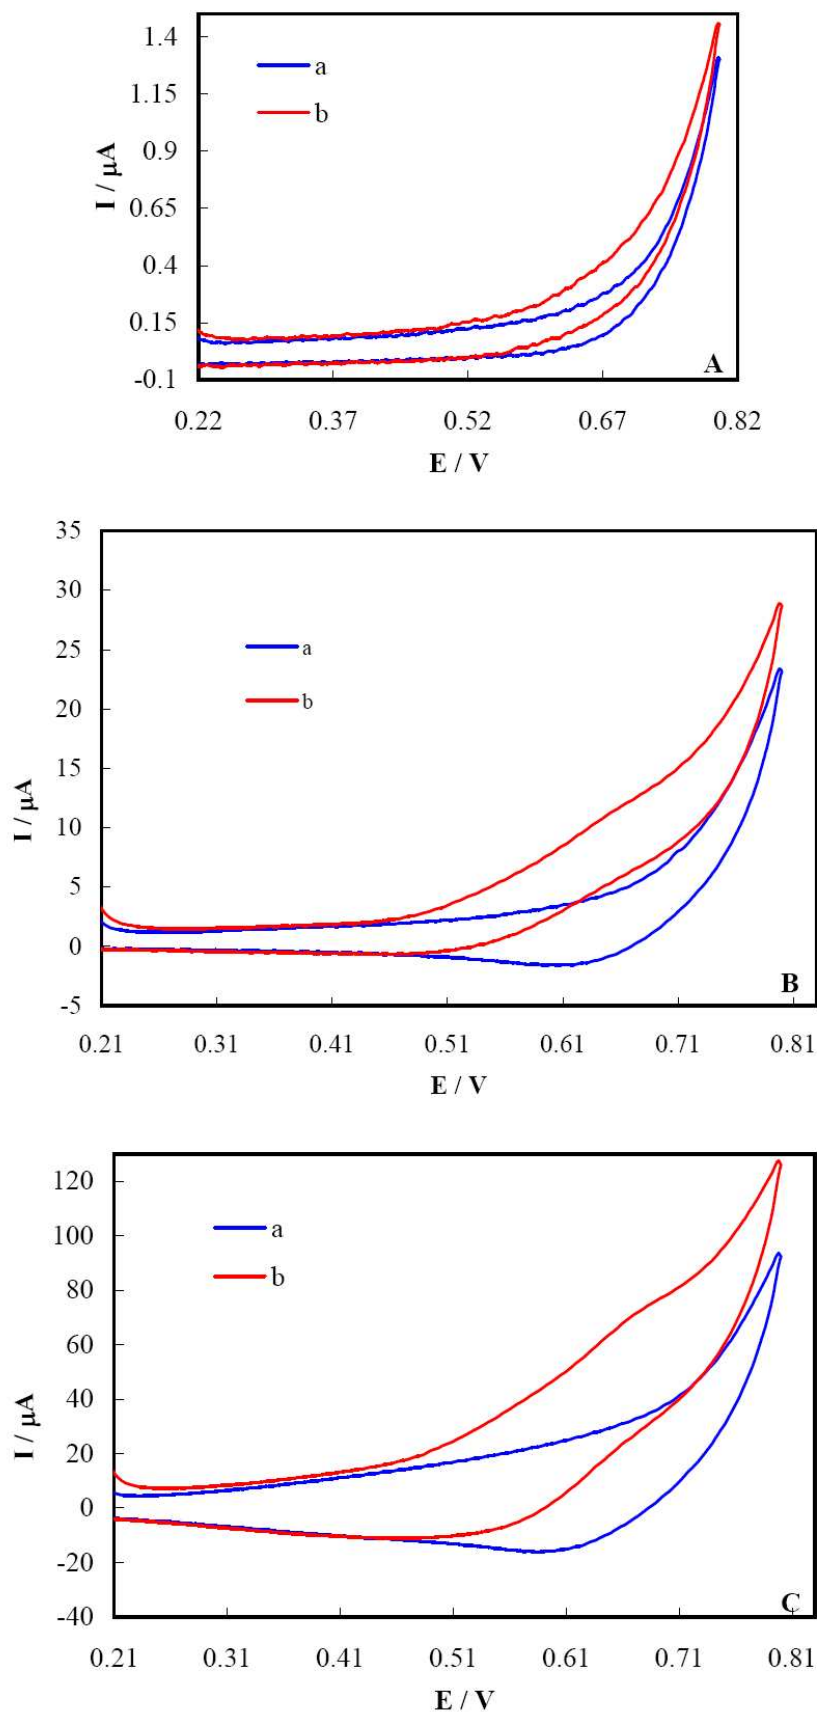

Figure S3-2: Cyclic voltammograms of UCPE (A), MCPE (B) and NCPE (C) in the absence (curve a) and presence (curve b) of 2.48 mM L-lysine. The potential sweep rate was  $50 \text{ mV s}^{-1}$ .

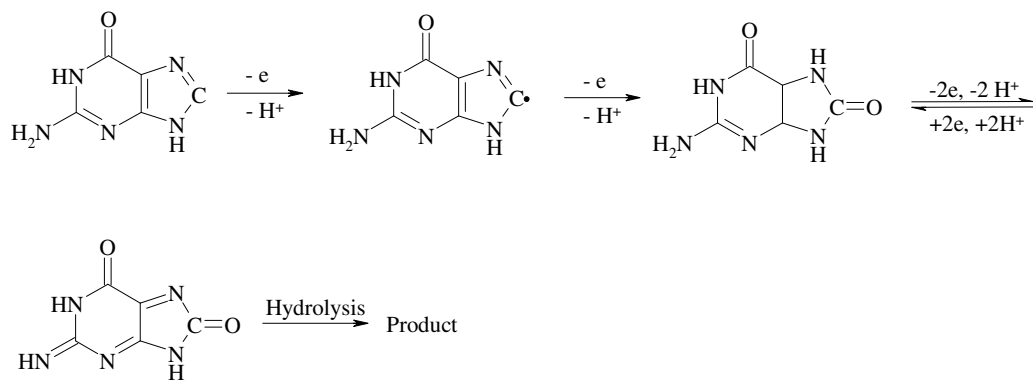

16  
17  
18  
19  
20  
21  
22  
23  
24  
25  
26  
27  
28  
29  
30  
31  
32  
33  
34  
35  
36  
37  
38  
39  
40  
41  
42  
43  
44  
45  
46  
47  
48  
49  
50  
51  
52  
53  
54  
55  
56  
57  
58  
59  
60

Scheme S4: The proposed reaction for the electrooxidation of guanine on NCPE.

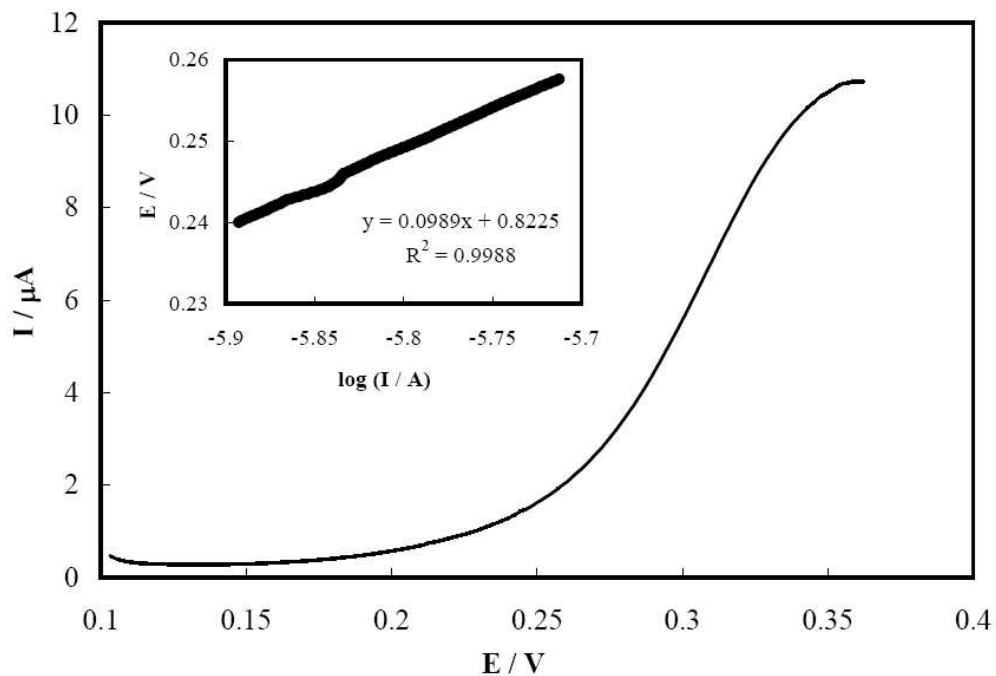

Figure S5: Steady-state polarization curves for NCPE in 100 mM sodium hydroxide in the presence of 2.48 mM guanine. Inset: The corresponding Tafel plot.
